# Supplementary material
Source: PubMed Central journal article supplement (PMC4651034)
Supplement: Supp_Figure1.pdf [file Supp_Figure1.pdf]

## Supplementary Data

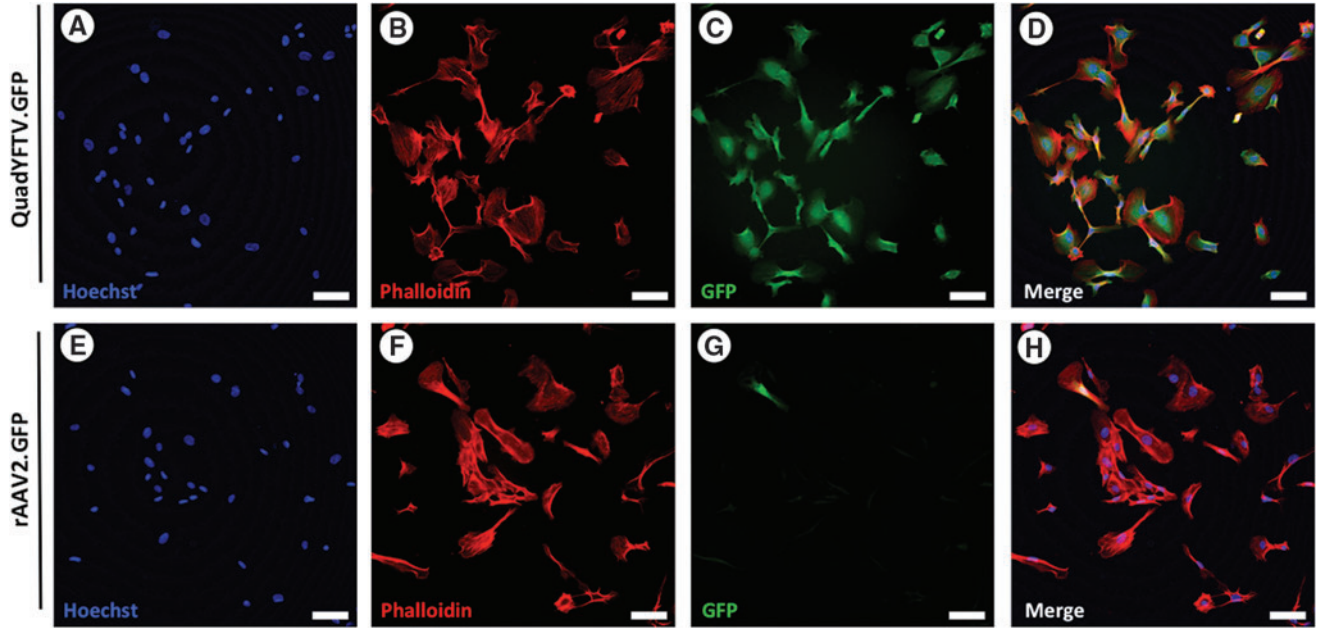

**Supplementary Figure S1.** Transduction of human umbilical vein endothelial cells (HUVECs) by QuadYF+TV vector (A–D) and unmodified AAV2 vector (E–H). GFP, intrinsic fluorescence. Scale bars, 20  $\mu\text{m}$ .

---
