# Supplementary material
Source: PubMed Central journal article supplement (PMC4651034)
Supplement: Supp_Table1.pdf [file Supp_Table1.pdf]

**Supplementary Table S1. Detail of experimental vector preparations used for in vitro and in vivo experiments**

| <i>Capsid</i> | <i>Promoter</i> | <i>Transgene</i> | <i>Titer</i>          | <i>Experiment</i>                    |
|---------------|-----------------|------------------|-----------------------|--------------------------------------|
| AAV2          | CBA             | GFP              | $1.45 \times 10^{13}$ | <i>In vitro</i> transduction study   |
| Trp1YF        | CBA             | GFP              | $9.27 \times 10^{12}$ | <i>In vitro</i> transduction study   |
| Trp1YF+TV     | CBA             | GFP              | $8.90 \times 10^{12}$ | <i>In vitro</i> transduction study   |
| QuadYF        | CBA             | GFP              | $1.64 \times 10^{13}$ | <i>In vitro</i> transduction study   |
| QuadYF+TV     | CBA             | GFP              | $2.66 \times 10^{13}$ | <i>In vitro</i> transduction study   |
| AAV2          | VECad           | GFP              | $5.11 \times 10^{13}$ | <i>In vivo</i> transduction study    |
| QuadYF+TV     | VECad           | GFP              | $9.82 \times 10^{12}$ | <i>In vivo</i> transduction study    |
|               | VECad           | GFP              | $5.50 \times 10^{13}$ | <i>In vivo</i> transduction study    |
|               | VECad           | GFP              | $4.66 \times 10^{13}$ | <i>In vivo</i> transduction study    |
| AAV2          | CMV-smVECad     | Luc              | $1.52 \times 10^{12}$ | <i>In vivo</i> bioluminescence study |
| QuadYF+TV     | CMV-smVECad     | Luc              | $4.44 \times 10^{12}$ | <i>In vivo</i> bioluminescence study |
| AAV2          | smCBA           | mCherry          | $2.35 \times 10^{12}$ | <i>In vitro</i> transduction study   |
| QuadYF+TV     | smCBA           | mCherry          | $4.83 \times 10^{12}$ | <i>In vitro</i> transduction study   |

AAV2, adeno-associated virus serotype 2; CBA, chicken  $\beta$ -actin; CMV, cytomegalovirus; CMV-smVECad, CMV enhanced small vascular endothelial cadherin; GFP, green fluorescent protein; Luc, firefly luciferase; mCherry, red fluorescent protein; QuadYF, QuadYF+TV, Trp1YF, Trp1YF+TV, AAV vectors incorporating up to five Y-F/T-V mutations (Y272F, Y444F, Y500F, Y730F, T491V); smCBA, small chicken  $\beta$ -actin; VECad, vascular endothelial cadherin.
